# Supplementary material for: Child Adversity and Trauma-Informed Care Teaching Interventions: A Systematic Review
Source: Oxford University Press journal article supplement (doi:10.1542/peds.2021-051174), 2022-02-15
Supplement: peds_2021051174supplementarydata.pdf [file peds_2021051174supplementarydata.pdf]

## Supplemental Information

### Evaluation of 30 Selected ACEs-TIC Curricula Using the GNOME\* and Kirkpatrick\*\* Frameworks

| CURRICULUM<br>Bold =<br>Exemplar (see<br>Table 4) | G<br>Goals                                                              | N<br>Needs | O<br>Objectives | M<br>Methods | E1<br>Evaluation<br>of Learners | E2<br>Evaluation<br>of<br>Curriculum | Kirkpatrick<br>Levels<br>(K1-K4) | Key Strengths                                                                                                                                                           |
|---------------------------------------------------|-------------------------------------------------------------------------|------------|-----------------|--------------|---------------------------------|--------------------------------------|----------------------------------|-------------------------------------------------------------------------------------------------------------------------------------------------------------------------|
|                                                   | Quality levels:<br>0= not described 1=low 2=moderate 3=high 4=very high |            |                 |              |                                 |                                      |                                  |                                                                                                                                                                         |
| 1. Dubowitz, 2011                                 | 3                                                                       | 3          | 0               | 4            | 4                               | 4                                    | K2,3                             | RCT, well-developed SR survey at 0,6,18,36 mo; observation of check-ups, chart review of screening                                                                      |
| 2. Feigelman, 2011                                | 3                                                                       | 3          | 0               | 4            | 4                               | 4                                    | K 2,3,4                          | RCT, screening tool, well-developed SR survey at 0,6,18 mo; chart review; Parent Satisfaction Q                                                                         |
| 3. Helitzer, 2011                                 | 3                                                                       | 1          | 0               | 4            | 4                               | 4                                    | K1,3                             | RCT, taped SP encounters w/ RIAS <sup>#</sup> coding at 0,6,18 mo; audiotaped pt risk asmt                                                                              |
| 4. Knox, 2013                                     | 2                                                                       | 4          | 0               | 3            | 3                               | 3                                    | K2                               | Excellent needs asmt: lit based, self-asmt, pre-curriculum vignette scale evaluation (2 Q, Y/N, presence of maltreatment, decision making); K2: vignette scale pre-post |
| 5. Green, 2015                                    | 3                                                                       | 3          | 1               | 4            | 4                               | 4                                    | K1,3                             | RCT, progressive case study, RIAS <sup>#</sup> coding of 90 taped SP encounters (3/learner)                                                                             |
| 6. McEvedy, 2017                                  | 3                                                                       | 0          | 4               | 3            | 1                               | 3                                    | K1,4                             | Train-the-trainer curr; K1: Focus groups, post interviews (qual), K4=trans of knowledge to others                                                                       |
| 7. Pelletier, 2017                                | 2                                                                       | 1          | 0               | 3            | 3                               | 3                                    | K2                               | Comparison study; 9 mo student elective with didactics, small groups, pt observation, pt case; K2: vignette scale evaluation pre-immersed post-6mo Q (cf Knox, 2013)    |
| 8. Schiff, 2017                                   | 3                                                                       | 3          | 3               | 4            | 2                               | 1                                    | K1,2                             | Detailed SR survey of attitudes, no objective measures                                                                                                                  |
| 9. Weiss, 2017                                    | 3                                                                       | 2          | 3               | 2            | 2                               | 2                                    | K1,2                             | Institution-wide 1-hr workshop, n=440<br>K1: satisfaction Q, good results<br>K2: pre-post SR survey (n=294)                                                             |
| 10. Wen, 2017                                     | 3                                                                       | 1          | 3               | 4            | 2                               | 1                                    | K1,3                             | K1: 53% resp to pre-post survey<br>K3: SR of applic of learning in practice                                                                                             |
| 11. Isobel, 2018                                  | 3                                                                       | 0          | 3               | 2-3          | 2                               | 1                                    | K1,2                             | Role plays with SPs + reflection; emphasis on participant safety/comfort; K2: SR knowledge and confidence only                                                          |
| 12. Elisseou, 2018 (Abstract)                     | 3                                                                       | 0          | 0               | 2            | 2                               | 2                                    | K1,2                             | MS workshop 2 hr, physical exam focus; SP demos' stud satisfaction high; ↑KSA pre-post                                                                                  |
| 13. Goldstein, 2018                               | 2                                                                       | 0          | 3               | 2            | 3                               | 1                                    | K2                               | Emphasis on student response; post curr asmt of SR learning w/ qualitative analysis                                                                                     |
| 14. Elisseou, 2019                                | 3                                                                       | 3          | 3               | 3            | 3                               | 2                                    | K1,2,3,4                         | Flipped classroom format; SP practice, K1: pre/post survey, K3: OSCE w/ evaluation rubric                                                                               |
| 15. Evans, 2019 (Abstract)                        | 1                                                                       | 0          | 0               | 1            | 1                               | 1                                    | K1,2                             | 90 MS, 1 hr curriculum                                                                                                                                                  |
| 16. Dueweke, 2019                                 | 3                                                                       | 2          | 0               | 3            | 3                               | 2                                    | K1,2,3                           | Needs well done, K1: detailed responses, K2: SR only, K3 chart review of screening, referral                                                                            |
| 17. Hoysted, 2019                                 | 2                                                                       | 1          | 3               | 2            | 3                               | 3                                    | K1,2                             | RCT, 15 min online module for ER staff<br>K1: high satisfaction; K2: ↑ SR knowledge on psychosocial care survey (pre, 1 wk, 1 mo post) vs controls                      |
| 18. Palfrey, 2019                                 | 3                                                                       | 4          | 0               | 4            | 4                               | 4                                    | K1,2,3,4                         | Strong workshop development: Unfolding pt vignettes + 10 evidence-based treatments, big change in practice was sustained                                                |
| 19. Pletcher, 2019                                | 3                                                                       | 1          | 3               | 3            | 1                               | 2                                    | K1,4                             | MEP, Good short example of student curriculum; practice tools; K1: strong                                                                                               |
| 20. Schmitz, 2019                                 | 3                                                                       | 3          | 4               | 3            | 2                               | 2                                    | K1,2,3,4                         | MEP, good curriculum planning; K3: Poor response rates, all SR measures                                                                                                 |

#### SUPPLEMENTAL FIGURE 2.

Evaluation of 30 Selected ACEs-TIC Curricula Using the GNOME and Kirkpatrick Frameworks. \*, GNOME framework; \*\*, Kirkpatrick framework.

| CURRICULUM<br>Bold =<br>Exemplar (see<br>Table 4) | G<br>Goals                                                              | N<br>Needs | O<br>Objectives | M<br>Methods | E1<br>Evaluation<br>of Learners | E2<br>Evaluation<br>of<br>Curriculum | Kirkpatrick<br>Levels<br>(K1-K4) | Key Strengths                                                                                                                                                        |
|---------------------------------------------------|-------------------------------------------------------------------------|------------|-----------------|--------------|---------------------------------|--------------------------------------|----------------------------------|----------------------------------------------------------------------------------------------------------------------------------------------------------------------|
|                                                   | Quality levels:<br>0= not described 1=low 2=moderate 3=high 4=very high |            |                 |              |                                 |                                      |                                  |                                                                                                                                                                      |
| 21. Cannon, 2020                                  | 3                                                                       | 0          | 2               | 2            | 3                               | 1                                    | K1,2                             | Good course preparation using cognitive interviews, K1: content safe and acceptable; qualitative comments; K2: Significant ↑ SR in KS outcomes pre vs post           |
| 22. Chokshi, 2020a                                | 3                                                                       | 0          | 3               | 2            | 2                               | 2                                    | K1,2,4                           | MEP; 4 x 30 min online modules; K1: 2 written comments, generally positive; K2: pre-post Q on SR KSA & practice: significant ↑ in scores                             |
| 23. Chokshi, 2020b                                | 2                                                                       | 2          | 3               | 3            | 2                               | 3                                    | K1,2,4                           | MEP; NA student course review; Objectives linked to ACGME competencies; Table 1 good model; K1: strong data on usefulness; K2: SR survey of knowledge/practice plans |
| 24. Jee, 2020                                     | 2                                                                       | 3          | 3               | 1            | 2                               | 1                                    | K2                               | NA well done: focus groups interviews; K2: pre-post surveys, interviews, key finding: compassion fatigue                                                             |
| 25. Kuhnly, 2020                                  | 2                                                                       | 0          | 0               | 3            | 3                               | 2                                    | K1,2                             | Focus on secondary trauma after perinatal death; 4 simulations; K1: strongly positive responses; K2: significant ↑ in SR experience, communication skills            |
| 26. McBurnie, 2020 (Abstract)                     | 3                                                                       | 2          | 2               | 2            | 1                               | 1                                    | K2                               | Multi-modal workshop for residents; K2: SR comfort levels pre-post                                                                                                   |
| 27. Miller-Cribbs, 2020                           | 3                                                                       | 0          | 4               | 4            | 4                               | 2                                    | K3                               | Excellent SP video evaluations w/ objective-based coding; Longitudinal asmt of residents Yr1 vs Y4, but poor response rate                                           |
| 28. Onigu Otitte, 2020                            | 3                                                                       | 0          | 3               | 2            | 2                               | 1                                    | K1,2                             | MEP; 1 hr didactic session with case and short video; K1: qualitative comments; K2: objective-based pre-post SR questionnaire on KSA                                 |
| 29. Shamaskin-Garroway, 2020                      | 1                                                                       | 1          | 2               | 3            | 3                               | 3                                    | K1,2,3                           | K1,2: 90% response rate; K3: post observation & feedback w/ checklist, but only n=6/21                                                                               |
| 30. McNamara, 2021                                | 0                                                                       | 1          | 3               | 2            | 2                               | 2                                    | K2,3                             | Large study, system focus, not learner centered; K2: comfort not screening; K3=referral and discharge planning                                                       |

NOTE: The 30 curricula described this table were chosen from the original 51 selected in our systematic review, based on the following criteria: addressed broad topics of ACEs, TIC, and/or child maltreatment, and were published after publication of Felliti et al. 1998.<sup>1</sup>

\* GNOME Curriculum Framework: Goals, Needs, Objectives, Methods, Evaluation of 1) learners 2) curriculum<sup>54</sup>

\*\* Kirkpatrick's 4 Levels of Evaluation: 1= Reaction, 2= Learning, 3= Behavior, 4= Results<sup>57</sup>

# RIAS = Roter Interaction Analysis System to evaluate patient centeredness scores<sup>23</sup>

Abbreviations: SP= standardized patient; Pt= patient; SR= self-report; asmt= assessment; MEP= MedEdPORTAL; KSA= knowledge, skills, attitudes; Q= Questionnaire; NA= needs assessment

## SUPPLEMENTAL FIGURE 2.

(Continued)
